# Supplementary material for: Early Embryo Exposure to Assisted Reproductive Manipulation Induced Subtle Changes in Liver Epigenetics with No Apparent Negative Health Consequences in Rabbit
Source: MDPI journal article supplement (doi:10.3390/ijms22189716), 2021-09-08
Supplement: s1 [file s1]

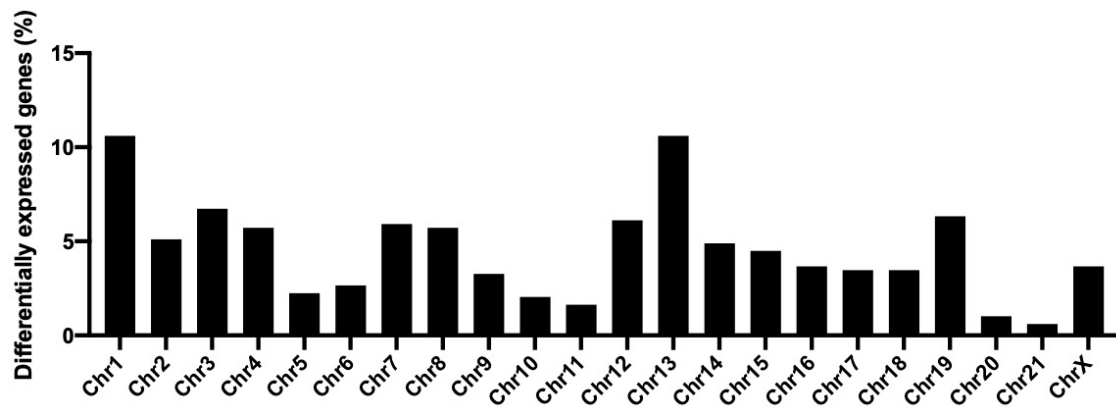

**Supplementary Figure S1.** Percentage of differentially expressed genes of our previous transcriptomic study that belong from each chromosome. [16] Garcia-Dominguez, X.; Marco-Jiménez, F.; Peñaranda, D.S.; Diretto, G.; García-Carpintero, V.; Cañizares, J.; Vicente, J.S. Long-term and transgenerational phenotypic, transcriptional and metabolic effects in rabbit males born following vitrified embryo transfer. *Sci. Rep.* 2020, 10, doi:10.1038/s41598-020-68195-9.
