# Supplementary material for: Early Embryo Exposure to Assisted Reproductive Manipulation Induced Subtle Changes in Liver Epigenetics with No Apparent Negative Health Consequences in Rabbit
Source: MDPI journal article supplement (doi:10.3390/ijms22189716), 2021-09-08
Supplement: s1 [file s1]

**Supplementary Table S4.** Differentially methylated genes in liver tissue of F3 generation animals derived from early embryos exposed to the combination of multiple ovulations, vitrification and embryo transfer (MOVET) and naturally-conceived (NC). The negative values are hypomethylated genes in the MOVET group, while the positive are hypermethylated.

| Type | Gene accession      | Gene name                                          | Chromosome /scaffold | $\Delta\beta$ (MOVET-NC) |
|------|---------------------|----------------------------------------------------|----------------------|--------------------------|
| Hypo | ENSOCUG000000023366 | WD repeat domain 4                                 | GL019261             | -4.70                    |
| Hypo | ENSOCUG000000017543 | Acylglycerol kinase, mitochondrial                 | GL019263             | -3.67                    |
| Hypo | ENSOCUG000000003231 | TBC1 domain family member 14                       | GL019275             | -3.61                    |
| Hypo | ENSOCUG000000007282 | SVOP like                                          | GL018853             | -3.14                    |
| Hypo | ENSOCUG000000004404 | Multiple C2 and transmembrane domain containing 2  | GL018708             | -3.05                    |
| Hypo | ENSOCUG000000006366 | S100 calcium binding protein P                     | GL019770             | -3.05                    |
| Hypo | ENSOCUG000000026584 | Ras association domain-containing protein 3        | GL018886             | -2.91                    |
| Hypo | ENSOCUG000000015993 | Par-6 family cell polarity regulator beta          | GL018822             | -2.81                    |
| Hypo | ENSOCUG000000004266 | Family with sequence similarity 222 member A       | GL019210             | -2.68                    |
| Hypo | ENSOCUG000000023160 | Olfactory receptor 6B3                             |                      | -2.65                    |
| Hypo | ENSOCUG000000007918 | NOP2/Sun RNA methyltransferase family member 2     | GL018756             | -2.51                    |
| Hypo | ENSOCUG000000007288 | Lon peptidase 2, peroxisomal                       | GL018732             | -2.51                    |
| Hypo | ENSOCUG000000002796 | DDB1- and CUL4-associated factor 12-like protein 2 |                      | -2.50                    |
| Hypo | ENSOCUG000000013731 | Runt related transcription factor 1                | GL018729             | -2.48                    |
| Hypo | ENSOCUG000000014651 | Dexh-box helicase 9                                | GL019071             | -2.42                    |
| Hypo | ENSOCUG000000004927 | Breast carcinoma amplified sequence 1              | GL018712             | -2.33                    |
| Hypo | ENSOCUG000000007274 | Tripartite motif containing 24                     | GL018853             | -2.28                    |
| Hypo | ENSOCUG000000014336 | Multivesicular body subunit 12B                    | GL018699             | -2.27                    |
| Hypo | ENSOCUG000000009223 | Docking protein 5                                  | GL018712             | -2.26                    |
| Hypo | ENSOCUG000000016405 | Evc ciliary complex subunit 2                      | GL018874             | -2.18                    |
| Hypo | ENSOCUG000000009429 | 1-acylglycerol-3-phosphate O-acyltransferase 5     | GL018713             | -2.03                    |
| Hypo | ENSOCUG000000010151 | WD repeat and FYVE domain containing 2             | GL018705             | -2.01                    |
| Hypo | ENSOCUG000000007803 | Disco interacting protein 2 homolog C              | GL018778             | -1.98                    |
| Hypo | ENSOCUG000000004466 | WD repeat domain 37                                | GL018707             | -1.93                    |
| Hypo | ENSOCUG000000023551 | Dnaj homolog subfamily C member 8                  | GL018701             | -1.91                    |
| Hypo | ENSOCUG000000008722 | KIAA2022 ortholog                                  | GL018757             | -1.63                    |
| Hypo | ENSOCUG000000003497 | SHC binding and spindle associated 1 like          | GL019071             | -1.45                    |
| Hypo | ENSOCUG000000000876 | Integrator complex subunit 6                       | GL018705             | -1.33                    |
| Hypo | ENSOCUG000000016847 | ATP binding cassette subfamily B member 7          | GL018757             | -1.25                    |
| Hypo | ENSOCUG000000013902 | Sperm acrosome associated 4                        | GL019039             | -0.94                    |
| Hypo | ENSOCUG000000016120 | Nucleolar GTP-binding protein 1                    | GL018778             | -0.70                    |

|       |                    |                                                              |          |       |
|-------|--------------------|--------------------------------------------------------------|----------|-------|
| Hypo  | ENSOCUG00000005446 | ADP ribosylation factor guanine nucleotide exchange factor 2 | GL018725 | -0.61 |
| Hypo  | ENSOCUG00000017426 | Glutamate metabotropic receptor 7                            | GL018703 | -0.60 |
| Hyper | ENSOCUG00000001208 | Relaxin/insulin like family peptide receptor 1               | GL018701 | 0.84  |
| Hyper | ENSOCUG00000005566 | G protein-coupled receptor 50                                | GL018731 | 1.11  |
| Hyper | ENSOCUG00000012148 | Inositol 1,4,5-trisphosphate receptor type 1                 | GL018703 | 1.21  |
| Hyper | ENSOCUG00000015945 | Mutated in colorectal cancers                                | GL018744 | 1.25  |
| Hyper | ENSOCUG00000003938 | Deleted in lymphocytic leukemia, 7                           | GL018705 | 1.26  |
| Hyper | ENSOCUG00000001660 | Von Willebrand factor C and EGF domains                      | GL018717 | 1.29  |
| Hyper | ENSOCUG00000017773 | Tankyrase                                                    | GL018709 | 1.35  |
| Hyper | ENSOCUG00000021608 | Pyridoxal                                                    | GL019091 | 1.43  |
| Hyper | ENSOCUG00000004645 | Whirlin                                                      | GL018699 | 1.44  |
| Hyper | ENSOCUG00000003760 | Kelch like family member 2                                   | GL018701 | 1.46  |
| Hyper | ENSOCUG00000001573 | Protein tyrosine phosphatase, receptor type T                | GL018718 | 1.50  |
| Hyper | ENSOCUG00000001518 | LCA5L, lebercilin like                                       | GL018907 | 1.51  |
| Hyper | ENSOCUG00000005132 | Williams-Beuren syndrome chromosome region 28                | GL018765 | 1.53  |
| Hyper | ENSOCUG00000021767 | Hydroxylysine kinase                                         | GL018746 | 1.53  |
| Hyper | ENSOCUG00000001499 | Pleckstrin homology domain containing A4                     | GL019028 | 1.55  |
| Hyper | ENSOCUG00000006423 | BCL2 associated X, apoptosis regulator                       | GL019028 | 1.55  |
| Hyper | ENSOCUG00000002815 | Interferon gamma receptor 2                                  | GL018729 | 1.60  |
| Hyper | ENSOCUG00000009375 | Protein phosphatase 6 catalytic subunit                      | GL018699 | 1.62  |
| Hyper | ENSOCUG00000004344 | Forkhead box K1                                              | GL018871 | 1.65  |
| Hyper | ENSOCUG00000012302 | PBX homeobox 3                                               | GL018699 | 1.69  |
| Hyper | ENSOCUG00000014169 | Ankyrin repeat and SOCS box containing 7                     | GL018753 | 1.76  |
| Hyper | ENSOCUG00000029446 | Tripartite motif containing 60                               | GL018701 | 1.79  |
| Hyper | ENSOCUG00000012963 | Suppressor of cancer cell invasion                           | GL018699 | 1.81  |
| Hyper | ENSOCUG00000006503 | TBC1 domain family member 2B                                 | GL018746 | 1.86  |
| Hyper | ENSOCUG00000023002 | Kelch-like protein 20                                        | GL018825 | 1.90  |
| Hyper | ENSOCUG00000001522 | SH3 domain binding glutamate rich protein                    | GL018907 | 1.91  |
| Hyper | ENSOCUG00000000146 | IQ motif containing gtpase activating protein 1              | GL018738 | 1.92  |
| Hyper | ENSOCUG00000007308 | Zinc finger and SCAN domain containing 2                     | GL018738 | 1.92  |
| Hyper | ENSOCUG00000011791 | Receptor interacting serine/threonine kinase 1               | GL018715 | 1.93  |
| Hyper | ENSOCUG00000025866 | Adenylate kinase 8                                           | GL018764 | 1.97  |
| Hyper | ENSOCUG00000007599 | Nuclear receptor subfamily 6 group A member 1                | GL018699 | 1.98  |
| Hyper | ENSOCUG00000009825 | Biphenyl hydrolase like                                      | GL018715 | 2.03  |
| Hyper | ENSOCUG00000014888 | Interferon alpha and beta receptor subunit 1                 | GL018729 | 2.08  |

|       |                    |                                                                    |          |      |
|-------|--------------------|--------------------------------------------------------------------|----------|------|
| Hyper | ENSOCUG00000016878 | BRCA2, DNA repair associated                                       | GL018702 | 2.11 |
| Hyper | ENSOCUG00000021019 | Ras protein specific guanine nucleotide releasing factor 1         | GL018746 | 2.27 |
| Hyper | ENSOCUG00000014818 | Potassium calcium-activated channel subfamily N member 2           | GL019132 | 2.28 |
| Hyper | ENSOCUG00000005747 | Collagen type XVI alpha 1 chain                                    | GL018704 | 2.28 |
| Hyper | ENSOCUG00000012670 | Arf-GAP with gtpase, ANK repeat and PH domain-containing protein 1 | GL018948 | 2.37 |
| Hyper | ENSOCUG00000016499 | Nad                                                                | GL018715 | 2.38 |
| Hyper | ENSOCUG00000008082 | Gtpase activating Rap/rangap domain like 3                         | GL018699 | 2.39 |
| Hyper | ENSOCUG00000029680 | Putative alpha-1-antitrypsin-related protein                       | GL018883 | 2.46 |
| Hyper | ENSOCUG00000016865 | Zinc finger protein 831                                            | GL018755 | 2.52 |
| Hyper | ENSOCUG00000003587 | Zinc finger MIZ-type containing 1                                  | GL018836 | 2.52 |
| Hyper | ENSOCUG00000013908 | Lysine acetyltransferase 5                                         | GL019220 | 2.59 |
| Hyper | ENSOCUG00000001607 | Putative serine protease 41                                        | GL018828 | 2.61 |
| Hyper | ENSOCUG00000002047 | Transient receptor potential cation channel subfamily M member 8   | GL018736 | 2.62 |
| Hyper | ENSOCUG00000011025 | Contactin 4                                                        | GL018703 | 2.63 |
| Hyper | ENSOCUG00000015227 | ADAM metalloproteinase with thrombospondin type 1 motif 17         | GL018753 | 2.64 |
| Hyper | ENSOCUG00000010830 | Proline rich coiled-coil 2B                                        | GL018764 | 2.76 |
| Hyper | ENSOCUG00000006729 | G protein-coupled receptor kinase 3                                | GL018766 | 2.78 |
| Hyper | ENSOCUG00000024741 | Transmembrane protease, serine 2                                   | GL019053 | 2.80 |
| Hyper | ENSOCUG00000014362 | Integrin subunit alpha L                                           | GL018752 | 2.83 |
| Hyper | ENSOCUG00000026490 | Arylacetamide deacetylase-like 4                                   | GL018739 | 2.92 |
| Hyper | ENSOCUG00000013433 | Slingshot protein phosphatase 1                                    | GL018777 | 3.05 |
| Hyper | ENSOCUG00000015765 | Isocitrate dehydrogenase 3                                         | GL018746 | 3.09 |
| Hyper | ENSOCUG00000003258 | Cytochrome c oxidase subunit 5A, mitochondrial                     | GL018768 | 3.15 |
| Hyper | ENSOCUG00000003266 | SIN3 transcription regulator family member A                       | GL018768 | 3.15 |
| Hyper | ENSOCUG00000016234 | SV2 related protein                                                | GL018777 | 3.25 |
| Hyper | ENSOCUG00000015510 | C2 calcium dependent domain containing 2                           | GL019181 | 3.40 |
| Hyper | ENSOCUG00000012944 | Ubiquitin conjugating enzyme E2 G2                                 | GL019021 | 3.66 |
| Hyper | ENSOCUG00000023837 | PR domain zinc finger protein 15                                   |          | 4.75 |

---

$\Delta\beta$ : Methylation difference calculated as mean MOVET DNA methylation minus mean NC DNA methylation.
