# Supplementary material for: Early Embryo Exposure to Assisted Reproductive Manipulation Induced Subtle Changes in Liver Epigenetics with No Apparent Negative Health Consequences in Rabbit
Source: MDPI journal article supplement (doi:10.3390/ijms22189716), 2021-09-08
Supplement: s1 [file s1]

**Supplementary Table S1.** Targeted identification of differentially accumulated metabolites in liver tissue of F3 generation animals derived from early embryos exposed to the combination of multiple ovulations, vitrification and embryo transfer (MOVET) and naturally-conceived (NC). The negative values are down-accumulated metabolites in the MOVET group, while the positive are up-accumulated.

| Metabolic pathway           | Metabolite name                                | Fold change<br>(Log2 MOVET/NC) |
|-----------------------------|------------------------------------------------|--------------------------------|
| Biosynthesis of amino acids | Arginine                                       | 0.13                           |
|                             | Asparagine                                     | 0.26                           |
|                             | Aspartate                                      | 0.28                           |
|                             | Cysteine                                       | <b>-2.00</b>                   |
|                             | Glutamic_acid                                  | 0.29                           |
|                             | Glutamine                                      | -0.15                          |
|                             | Histidine                                      | <b>0.23</b>                    |
|                             | Isoleucine-leucine                             | 0.46                           |
|                             | Lysine                                         | 0.05                           |
|                             | Methionine                                     | 0.27                           |
|                             | Phenylalanine                                  | 0.24                           |
|                             | Proline                                        | 0.28                           |
|                             | Serine                                         | -1.65                          |
|                             | Threonine                                      | 0.31                           |
|                             | Tryptophan                                     | <b>-1.07</b>                   |
|                             | Tyrosine                                       | 0.35                           |
|                             | Valine                                         | 0.72                           |
| Arachidonic acid metabolism | 11-dehydro_Thromboxane_B2                      | 0.12                           |
|                             | Hepoxilin_A3                                   | 0.32                           |
|                             | Leukotriene_F4                                 | 0.17                           |
|                             | Prostaglandin_B2                               | <b>-0.38</b>                   |
|                             | Prostacyclin                                   | 0.08                           |
|                             | 11,14,15-theta                                 | 0.39                           |
|                             | 15-Keto-prostaglandin_f2alpha                  | <b>-0.52</b>                   |
|                             | 6-ketoprostaglandin_e1                         | 0.17                           |
|                             | Trioxilin_A3                                   | 0.18                           |
|                             | 11,14,15-theta                                 | -0.34                          |
| Linoleic acid metabolism    | 5,6-Dihydroxy-8Z,11Z,14Z-eicosatrienoic_acid   | 0.24                           |
|                             | 5-hete                                         | <b>-0.47</b>                   |
|                             | 5-oxo-ete                                      | <b>-0.38</b>                   |
|                             | 6-ketoprostaglandin_e1                         | -0.16                          |
|                             | Lecithins                                      | <b>-1.15</b>                   |
|                             | Tetrahydro-3,4-furandiol                       | -0.10                          |
|                             | Prostacyclin                                   | -0.38                          |
|                             | 14,15,19-/14,15,20-trihydroxy-5,8,11-eicosatri | <b>-0.42</b>                   |
|                             | 11(12)oxido-5,8,14-eicosatrienoic_acid         | <b>-0.52</b>                   |
|                             |                                                |                                |

|                                         |                                                |              |
|-----------------------------------------|------------------------------------------------|--------------|
|                                         | 14,15-dihydroxy-5,-8,11-eicosatrienoic_acid    | <b>-0.60</b> |
|                                         | 11,12,19-/11,12,20-trihydroxy-5,8,14-eicosatri | <b>-0.53</b> |
|                                         | 5(6)oxido-8,11,14-eicosatrienoic_acid          | <b>-0.86</b> |
|                                         | PC_(36:5)                                      | <b>-0.93</b> |
|                                         | PC_(38:7)                                      | -0.15        |
|                                         | PC_(34:4)                                      | <b>-0.75</b> |
|                                         | PC_(30:3)                                      | <b>-0.65</b> |
|                                         | PC_(40:6)                                      | -0.15        |
|                                         | PC_(38:6)                                      | -0.39        |
|                                         | PC_(36:4)                                      | <b>-0.76</b> |
|                                         | PC_(30:0)                                      | <b>-0.82</b> |
|                                         | PC_(34:1)                                      | -0.36        |
|                                         | PC_(34:2)                                      | <b>-0.61</b> |
|                                         | PC_(38:5)                                      | <b>-0.61</b> |
|                                         | PC_(36:3)                                      | <b>-0.61</b> |
|                                         | PC_(38:4)                                      | <b>-0.62</b> |
|                                         | PC_(34:0)                                      | <b>-0.45</b> |
|                                         | PC_(32:1)                                      | <b>-0.65</b> |
|                                         | PC_(36:1)                                      | <b>-0.73</b> |
|                                         | PC_(32:0)                                      | -0.30        |
|                                         | PC_(36:2)                                      | <b>-0.81</b> |
|                                         | PC_(40:5)                                      | <b>-0.91</b> |
|                                         | PC_(34:6)                                      | <b>-0.82</b> |
| Glycolysis<br>Gluconeogenesis           | 2-hydroxy-ethyl-thpp                           | 0.65         |
|                                         | Camp                                           | 0.47         |
|                                         | Glucose                                        | -0.41        |
|                                         | Glyceraldehyde-3P                              | 0.14         |
|                                         | Glycerate-1,3P2                                | -0.21        |
|                                         | Glycerate-3P                                   | <b>2.57</b>  |
|                                         | $\beta$ -D-Fructose-1,6P2                      | <b>-0.44</b> |
|                                         | $\beta$ -D-Glucose-6P                          | 0.15         |
|                                         | Thpp                                           | <b>1.65</b>  |
|                                         | S-acetyl-dihydrolipoamide-e                    | <b>0.34</b>  |
|                                         | Lipoamide-E                                    | -0.34        |
| Oxidative phosphorylation               | Adenosine_diphosphate                          | 0.05         |
|                                         | Fad2+                                          | -0.13        |
|                                         | Fumarate                                       | 0.41         |
|                                         | Gluconate                                      | -0.15        |
|                                         | Glucose                                        | -0.41        |
|                                         | Nadh                                           | 1.05         |
|                                         | Succinate                                      | 0.02         |
| Biosynthesis of unsaturated fatty acids | Adrenic_acid                                   | <b>-0.77</b> |

|                      |                                             |       |
|----------------------|---------------------------------------------|-------|
|                      | Arachidic_acid                              | -0.48 |
|                      | Arachidonic_acid                            | -0.58 |
|                      | Behenic_acid                                | -0.61 |
|                      | Docosadienoic_acid                          | -0.49 |
|                      | Docosahexaenoic_acid                        | -0.36 |
|                      | Docosapentaenoic_acid                       | -0.71 |
|                      | Erucic_acid                                 | -0.17 |
|                      | Icosadienoic_acid                           | -0.18 |
|                      | Icosapentaenoic_acid                        | -0.35 |
|                      | Icosatrienoic_acid                          | -0.32 |
|                      | Icosenoic_acid                              | -0.10 |
|                      | Lignoceric_acid                             | -0.42 |
|                      | Linoleic_acid                               | -0.67 |
|                      | Nervonic_acid                               | -0.63 |
|                      | Oleic_acid                                  | -0.48 |
|                      | A-Linolenic_acid                            | -0.58 |
|                      | Palmitic_acid                               | -0.28 |
|                      | Stearic_acid                                | -0.20 |
| Steroid biosynthesis | 24-epi-Campesterol                          | -0.70 |
|                      | 24-methylenecholesterol                     | 2.87  |
|                      | 5-dehydroavenasterol                        | 0.18  |
|                      | 7-dehydrocholesterol                        | -0.16 |
|                      | 7alpha,24-Dihydroxy-4-cholesten-3-one       | -0.44 |
|                      | Episterol                                   | -0.34 |
|                      | Lathosterol                                 | -0.26 |
|                      | Secalciferol                                | -0.79 |
|                      | 3alpha,7alpha-Dihydroxy-5beta-cholestanate  | -0.04 |
|                      | S-squalene_2,3-epoxide                      | -0.56 |
|                      | 22(r)-hydroxycholesterol                    | -0.98 |
|                      | 3alpha,7alpha,26-Trihydroxy-5beta-cholestan | -0.10 |
|                      | Calcidiol                                   | -0.06 |
|                      | 14-demethyllanosterol                       | 0.01  |
|                      | 4alpha-Methylzymosterol-4-carboxylate       | 0.92  |
|                      | Squalene                                    | -0.54 |
|                      | 3alpha,7alpha,12alpha,26-Tetrahydroxy-5beta | 0.80  |
|                      | Calcitriol                                  | -0.62 |
|                      | Cholesterol                                 | -0.14 |
|                      | 7-dehydridesmosterol                        | -0.99 |
|                      | Campesterol                                 | -0.10 |
|                      | 3alpha,7alpha-Dihydroxy-5beta-cholestane    | -0.29 |
|                      | Pregnenolone                                | -0.66 |
|                      | Calcitretol                                 | 0.90  |

|                              |                                |              |
|------------------------------|--------------------------------|--------------|
|                              | 4alpha-Methylzymosterol        | -0.52        |
| Steroid hormone biosynthesis | Cortisol                       | -0.30        |
|                              | 6 $\beta$ hydroxy testosterone | 0.07         |
|                              | Aldosterone                    | <b>-0.52</b> |
|                              | Androsterone                   | -0.14        |
|                              | B-Estradiol                    | -0.20        |
|                              | Corticosterone                 | 0.35         |
|                              | Cortol                         | -0.37        |
|                              | Cortolone                      | -0.45        |
|                              | Estriol                        | <b>-0.19</b> |
|                              | Methoxyestrone                 | 0.01         |
|                              | Pregnenolone                   | 0.28         |
|                              | Progesterone                   | -0.13        |
|                              | Testosterone                   | <b>-0.43</b> |
|                              | Cortol                         | -0.42        |
|                              | Pregnanediol                   | -0.49        |
| Glycerolipid metabolism      | TAG_(50:1)                     | <b>-1.86</b> |
|                              | TAG_(50:4)                     | <b>-1.98</b> |
|                              | TAG_(54:5)                     | <b>-1.06</b> |
|                              | TAG_(54:9)                     | <b>-1.36</b> |
|                              | TAG_(54:8)                     | <b>-1.59</b> |
|                              | TAG_(52:1)                     | <b>-1.17</b> |
|                              | TAG_(52:2)                     | <b>-1.11</b> |
|                              | TAG_(50:0)                     | <b>-1.38</b> |
| Citrate cycle (TCA cycle)    | 2-hydroxy-ethyl-thpp           | 0.65         |
|                              | 3-carboxy-1-hydroxypropyl-thpp | -0.85        |
|                              | Cis-aconitate                  | 0.10         |
|                              | Citrate                        | <b>-0.30</b> |
|                              | Oxalosuccinate                 | <b>2.09</b>  |
|                              | Succinate                      | 0.02         |
|                              | Thpp                           | <b>1.65</b>  |
|                              | S-acetyl-dihydrolipoamide-e    | <b>0.34</b>  |
|                              | Lipoamide-E                    | -0.34        |

Red denotes statistical differences at  $p < 0.05$ .
