# Supplementary material for: Early Embryo Exposure to Assisted Reproductive Manipulation Induced Subtle Changes in Liver Epigenetics with No Apparent Negative Health Consequences in Rabbit
Source: MDPI journal article supplement (doi:10.3390/ijms22189716), 2021-09-08
Supplement: s1 [file s1]

**Supplementary Table S2.** Differentially expressed proteins in liver tissue of F3 generation animals derived from early embryos exposed to the combination of multiple ovulations, vitrification and embryo transfer (MOVET) and naturally-conceived (NC). The negative values are down-expressed proteins in the MOVET group, while the positive are up-expressed.

| Uniprot accession | Gene name                                                      | Fold change<br>(Log2 MOVET/NC) |
|-------------------|----------------------------------------------------------------|--------------------------------|
| U3KPP4            | Cytochrome P450 2C30                                           | -3.78                          |
| G1T1G8            | Periplakin                                                     | -3.60                          |
| G1SRH7            | Serine and arginine rich splicing factor 3                     | -2.08                          |
| G1TYL5            | 2'-deoxynucleoside 5'-phosphate N-hydrolase 1                  | -1.95                          |
| A0A0A0MQQ2        | S100 calcium binding protein A12                               | -1.95                          |
| G1TN25            | Alpha-2-glycoprotein 1, zinc-binding                           | -1.91                          |
| G1T7F1            | Histone H1.4                                                   | -1.66                          |
| G1TIS5            | Annexin A1                                                     | -1.62                          |
| P12345            | Glutamic-oxaloacetic transaminase 2                            | -1.55                          |
| G1SJS1            | Histone H2B type 2-E                                           | -1.37                          |
| G1U522            | Protein kinase camp-dependent type II regulatory subunit alpha | -1.27                          |
| G1SMM7            | Small nuclear ribonucleoprotein D3 polypeptide                 | -1.21                          |
| G1TC61            | Putative RNA-binding protein Luc7-like 2                       | -1.07                          |
| G1T7S1            | Aflatoxin B1 aldehyde reductase member 3                       | -1.04                          |
| G1TUX5            | Protein HP-25 homolog 2                                        | -1.01                          |
| G1T5K6            | Translocase of outer mitochondrial membrane 40 like            | -0.97                          |
| G1TP83            | Histone H2B type 1                                             | -0.94                          |
| B7NZF9            | Nucleophosmin                                                  | -0.93                          |
| G1TN62            | 40S ribosomal protein S19                                      | -0.89                          |
| G1TWP4            | Valyl-trna synthetase                                          | -0.84                          |
| G1T726            | Hydroxyacyl-coa dehydrogenase                                  | -0.83                          |
| G1TFX2            | Alpha-1-antitrypsin                                            | -0.83                          |
| G1SHI0            | Acetyl-coa acyltransferase 1                                   | -0.81                          |
| G1SSN2            | Sirtuin 5                                                      | -0.71                          |
| G1SN67            | Serpin family B member 1                                       | -0.67                          |
| G1U7L4            | Heat shock protein family A                                    | -0.59                          |
| G1T9I4            | Sorcin                                                         | -0.57                          |
| G1TBU9            | Acetyl-coa acyltransferase 2                                   | -0.51                          |
| G1SU01            | Nipsnap homolog 3A                                             | -0.43                          |
| G1TES6            | Hydroxysteroid 17-beta dehydrogenase 10                        | -0.40                          |
| G1T3Y8            | Heat shock protein family D                                    | -0.27                          |
| G1TU13            | 40S ribosomal protein S17                                      | -0.23                          |
| G1T0L9            | Ribophorin I                                                   | -0.13                          |
| G1TPR2            | Glucosamine-phosphate N-acetyltransferase 1                    | 0.30                           |
| G1SVP7            | Glutathione S-transferase omega 1                              | 0.30                           |
| G1TE35            | Nudix hydrolase 12                                             | 0.35                           |

|        |                                                          |      |
|--------|----------------------------------------------------------|------|
| G1T3Z1 | Mannose binding lectin 2                                 | 0.40 |
| G1SVJ1 | Dihydropyrimidine dehydrogenase                          | 0.42 |
| G1TS42 | Amylo-alpha-1, 6-glucosidase, 4-alpha-glucanotransferase | 0.45 |
| G1SV60 | Transmembrane and coiled-coil domains 1                  | 0.46 |
| G1SN14 | Cullin associated and neddylation dissociated 1          | 0.48 |
| G1TAH7 | Transketolase                                            | 0.49 |
| G1U2K8 | Cytochrome P450-like                                     | 0.51 |
| G1TCT8 | Major facilitator superfamily domain containing 9        | 0.53 |
| G1T6X2 | Cytochrome P450 2C15-like                                | 0.54 |
| G1U7D9 | Solute carrier family 27 member 5                        | 0.57 |
| U3KLZ1 | Flavin containing monooxygenase 3                        | 0.66 |
| G1SMY3 | 2-acylglycerol O-acyltransferase 2-B                     | 0.67 |
| G1TBR1 | NAD                                                      | 0.68 |
| G1T3H9 | Desmocollin 2                                            | 0.71 |
| G1U4I6 | Fatty acid amide hydrolase                               | 0.80 |
| G1SKJ7 | Glycine N-methyltransferase                              | 0.80 |
| G1TUC2 | CCHC-type zinc finger nucleic acid binding protein       | 0.82 |
| G1TZE5 | Chromosome 13 open reading frame, human c1orf50          | 0.96 |
| G1TYM3 | Cytochrome P450, family 2, subfamily b, polypeptide 4    | 0.96 |
| G1TLX2 | Cytochrome P450 2C16                                     | 0.98 |
| G1T9T6 | Ethanolamine-phosphate phospho-lyase                     | 1.01 |
| G1T932 | Pipecolic acid and sarcosine oxidase                     | 1.03 |
| G1TI39 | Radixin                                                  | 1.03 |
| G1SL36 | Glycine decarboxylase                                    | 1.04 |
| G1TR70 | Cytochrome P450 2C4                                      | 1.07 |
| U3KM06 | UDP-glucuronosyltransferase 2A3                          | 1.14 |
| G1U9S0 | Cytochrome P450 2C2                                      | 1.20 |
| G1T0Z2 | Histone H2A type 1-A                                     | 1.51 |
| G1SUM7 | ATP binding cassette subfamily C member 2                | 1.66 |
| G1SEE9 | Thyroid hormone responsive                               | 1.76 |
| G1TGH4 | Retinol saturase                                         | 1.77 |
| G1TPC5 | Tumor protein D52                                        | 1.79 |
| G1ST24 | Acetyl-coa carboxylase beta                              | 2.05 |
| G1TTZ8 | Formimidoyltransferase cyclodeaminase                    | 2.13 |
| G1SZ66 | Mannose-P-dolichol utilization defect 1                  | 5.80 |

---
